# Supplementary material
Source: publisher figshare collection journal article supplement (https://diabetesjournals.figshare.com/articles/dataset/_/22242586)
Supplement: Supplementary file 2 [file 1]

1 **Supplemental Data**

2 *Supplemental Data Tables*

3 Table S1. Baseline characteristics and *ADRB2* Gly16Arg genotype

|                                       | AA                   | GG                   | p-value |
|---------------------------------------|----------------------|----------------------|---------|
| Number of subjects                    | 13                   | 12                   | -       |
| Age (years)                           | 23.4 ± 0.8           | 24.6 ± 0.5           | 0.24    |
| Height (cm)                           | 186 ± 2.3            | 185 ± 1.7            | 0.46    |
| Weight (kg)                           | 79.5 ± 1.7           | 81.0 ± 2.4           | 0.62    |
| Body mass index (kg m <sup>-2</sup> ) | 23.1 ± 0.4           | 23.7 ± 0.5           | 0.35    |
| Body surface area (m <sup>2</sup> )   | 2.02 ± 0.03          | 2.04 ± 0.04          | 0.80    |
| HbA1c (% [mmol mol <sup>-1</sup> ])   | 5.0 ± 0 [31.5 ± 0.7] | 5.0 ± 0 [31.3 ± 0.7] | 0.78    |
| Creatinine (umol l <sup>-1</sup> )    | 74.6 ± 2.9           | 72.2 ± 2.0           | 0.47    |

4

5 Values are mean ± SEM. Subjects homozygous for either the Arg16 allele (AA) or the Gly16 allele (GG) of the β<sub>2</sub>-receptor  
6 gene (*ADRB2*) are compared by unpaired t-test if normally distributed or by Mann-Whitney U test if not.

7

8 Table S2. Comparison of plasma glucose, insulin, substrates, and circulatory measures, between *ADRB2*  
9 genotype groups of AA subjects and GG subjects, at baseline before and after repeated hypoglycemia

|                                                        | Baseline pre-hypoglycemia |             |         | Baseline post-hypoglycemia |             |         |
|--------------------------------------------------------|---------------------------|-------------|---------|----------------------------|-------------|---------|
|                                                        | AA                        | GG          | p-value | AA                         | GG          | p-value |
| <i>Glucose, insulin, and insulin sensitivity</i>       |                           |             |         |                            |             |         |
| Plasma glucose (mmol l <sup>-1</sup> )                 | 4.58 ± 0.10               | 4.75 ± 0.13 | 0.34    | 5.39 ± 0.11                | 5.61 ± 0.12 | 0.13    |
| Insulin (pmol l <sup>-1</sup> )                        | 57.4 ± 7.5                | 46.5 ± 5.9  | 0.26    | 79.7 ± 9.5                 | 72.1 ± 6.6  | 0.31    |
| C-peptide (pmol l <sup>-1</sup> )                      | 574 ± 40                  | 587 ± 49    | 0.93    | 687 ± 44                   | 686 ± 49    | 1.0     |
| HOMA-IR                                                | 1.98 ± 0.29               | 1.66 ± 0.24 | 0.40    | 3.24 ± 0.47                | 3.02 ± 0.31 | 0.98    |
| <i>Substrates</i>                                      |                           |             |         |                            |             |         |
| Lactate (mmol l <sup>-1</sup> )                        | 0.64 ± 0.05               | 0.83 ± 0.11 | 0.15    | 1.24 ± 0.11                | 1.48 ± 0.05 | 0.081   |
| Glycerol (μmol l <sup>-1</sup> )                       | 31.9 ± 4.2                | 40.7 ± 5.7  | 0.23    | 26.6 ± 3.8                 | 40.4 ± 4.9  | 0.037*  |
| FFA (μmol l <sup>-1</sup> )                            | 432 ± 46                  | 409 ± 29    | 0.68    | 270 ± 30                   | 247 ± 24    | 0.56    |
| β-hydroxybutyrate (mmol l <sup>-1</sup> )              | 0.15 ± 0.04               | 0.16 ± 0.06 | 0.68    | 0.05 ± 0.01                | 0.04 ± 0.00 | 0.73    |
| Alanine (μmol l <sup>-1</sup> )                        | 221 ± 20                  | 252 ± 26    | 0.24    | 437 ± 21                   | 479 ± 24    | 0.21    |
| <i>Circulatory measures</i>                            |                           |             |         |                            |             |         |
| Heart rate (beats min <sup>-1</sup> )                  | 57.0 ± 2.7                | 56.6 ± 2.5  | 0.91    | 63.2 ± 3.2                 | 63.5 ± 2.9  | 0.94    |
| Stroke volume (ml)                                     | 111.2 ± 3.9               | 109.5 ± 4.8 | 0.78    | 115.8 ± 3.9                | 114.6 ± 4.9 | 0.84    |
| Cardiac output (L min <sup>-1</sup> )                  | 6.2 ± 0.3                 | 6.1 ± 0.3   | 0.79    | 7.1 ± 0.2                  | 7.2 ± 0.5   | 0.89    |
| Systemic vascular resistance (dyn s cm <sup>-5</sup> ) | 1128 ± 59                 | 1070 ± 49   | 0.64    | 925 ± 45                   | 929 ± 55    | 0.96    |
| Systolic pressure (mmHg)                               | 127.9 ± 3.2               | 123.9 ± 3.6 | 0.42    | 124.3 ± 3.1                | 122.3 ± 3.3 | 0.67    |
| Diastolic pressure (mmHg)                              | 64.8 ± 1.4                | 60.3 ± 1.6  | 0.052   | 60.7 ± 2.0                 | 61.3 ± 1.6  | 0.83    |
| Mean arterial pressure (mmHg)                          | 85.2 ± 1.6                | 79.3 ± 2.2  | 0.044*  | 80.7 ± 2.3                 | 80.8 ± 2.1  | 0.96    |

11 Values are mean  $\pm$  SEM. Comparison between genotype groups of subjects homozygous for either the Arg16 allele (AA)  
12 or the Gly16 allele (GG) of the  $\beta_2$ -receptor gene (*ADRB2*), at baseline before and after repeated hypoglycemia (pre-  
13 hypoglycemia and post-hypoglycemia, respectively), were by unpaired t-test if normally distributed or by Mann-Whitney  
14 U test if not. No missing values (n=25). \*  $P \leq 0.05$

15

16 Table S3. Comparison between subjects homozygous for the Arg16 allele and Gly16 allele of the  $\beta_2$ -receptor  
 17 gene (*ADRB2*), in the glucose, insulin, substrate, and circulatory responses to epinephrine, before and after  
 18 repeated hypoglycemia

|                                                         | Pre-hypoglycemia (D1 <sub>pre</sub> ) |             |          | Post-hypoglycemia (D4 <sub>post</sub> ) |             |         |
|---------------------------------------------------------|---------------------------------------|-------------|----------|-----------------------------------------|-------------|---------|
|                                                         | AA                                    | GG          | p-value  | AA                                      | GG          | p-value |
| <i>Glucose, insulin, and C-peptide</i>                  |                                       |             |          |                                         |             |         |
| Glucose (mmol l <sup>-1</sup> h)                        | 2.97 ± 0.15                           | 3.18 ± 0.20 | 0.42     | 2.68 ± .015                             | 2.43 ± 0.26 | 0.15    |
| Insulin (pmol l <sup>-1</sup> h)                        | 44 ± 8                                | 93 ± 13     | 0.0051** | 79 ± 19                                 | 108 ± 14    | 0.21    |
| C-peptide (pmol l <sup>-1</sup> h)                      | 135 ± 52                              | 307 ± 59    | 0.041*   | 295 ± 98                                | 397 ± 52    | 0.37    |
| <i>Substrates</i>                                       |                                       |             |          |                                         |             |         |
| Lactate (mmol l <sup>-1</sup> h)                        | 2.71 ± 0.21                           | 3.15 ± 0.37 | 0.32     | 2.02 ± 0.16                             | 2.25 ± 0.25 | 0.45    |
| Glycerol (μmol l <sup>-1</sup> h)                       | 79 ± 12                               | 115 ± 14    | 0.041*   | 63 ± 7                                  | 64 ± 9      | 0.96    |
| FFA (μmol l <sup>-1</sup> h)                            | 724 ± 96                              | 1113 ± 140  | 0.033*   | 570 ± 60                                | 643 ± 92    | 0.51    |
| β-hydroxybutyrate (mmol l <sup>-1</sup> h)              | 0.34 ± 0.11                           | 0.44 ± 0.08 | 0.31     | 0.09 ± 0.04                             | 0.07 ± 0.02 | 0.68    |
| Alanine (μmol l <sup>-1</sup> h)                        | 90 ± 15                               | 43 ± 22     | 0.10     | -44 ± 14                                | -76 ± 40    | 0.47    |
| <i>Circulatory Measures</i>                             |                                       |             |          |                                         |             |         |
| Heart rate (beats min <sup>-1</sup> h)                  | 38.2 ± 3.6                            | 35.5 ± 2.9  | 0.56     | 29.0 ± 2.7                              | 27.8 ± 3.4  | 0.77    |
| Stroke volume (ml h)                                    | 33.6 ± 5.6                            | 40.7 ± 5.3  | 0.37     | 24.5 ± 3.7                              | 28.3 ± 5.5  | 0.58    |
| Cardiac output (L min <sup>-1</sup> h)                  | 6.8 ± 0.6                             | 7.1 ± 0.6   | 0.78     | 5.3 ± 0.4                               | 5.4 ± 0.7   | 0.26    |
| Systemic vascular resistance (dyn s cm <sup>-5</sup> h) | -818 ± 72                             | -781 ± 53   | 0.83     | -543 ± 53                               | 538 ± 60    | 0.95    |
| Systolic pressure (mmHg h)                              | 3.4 ± 5.3                             | 8.3 ± 4.3   | 0.48     | 6.4 ± 4.8                               | 7.0 ± 3.2   | 0.93    |
| Diastolic pressure (mmHg h)                             | -14.3 ± 1.6                           | -14.4 ± 2.7 | 0.96     | -10.2 ± 2.0                             | -12.2 ± 3.1 | 0.60    |
| Mean arterial pressure (mmHg h)                         | -11.8 ± 2.2                           | -12.0 ± 2.7 | 0.97     | -9.2 ± 2.5                              | -10.4 ± 2.9 | 0.77    |

20 The values of plasma glucose, insulin, substrate, and circulatory responses to epinephrine before, and after repeated  
21 hypoglycemia (pre-hypoglycemia, and post-hypoglycemia respectively), are indicated as the change from the preceding  
22 baseline values during a 2h period (area under the curve (AUC), values are mean  $\pm$  SEM. Comparison between subjects  
23 homozygous for the Arg16 allele (AA subjects) and Gly16 allele (GG subjects) of the  $\beta_2$ -receptor gene (*ADRB2*) was by  
24 unpaired t-test if normally distributed or Wilcoxon signed-rank test if not. No missing values (n=25). \*  $P \leq 0.05$ ; \*\*  $P \leq$   
25 0.01

26

27

28 Table S4. Comparison of changes in baseline plasma glucose, insulin, substrates, and circulatory measures,  
 29 between before and after repeated hypoglycemia, in the *ADRB2* genotype groups of AA subjects and GG  
 30 subjects.

|                                                        | Baseline AA $\Delta$ -values |             | Baseline GG $\Delta$ -values |             |
|--------------------------------------------------------|------------------------------|-------------|------------------------------|-------------|
|                                                        | (post- vs pre-hypoglycemia)  | p-value     | (post- vs pre-hypoglycemia)  | p-value     |
| <i>Glucose, insulin, and insulin sensitivity</i>       |                              |             |                              |             |
| Plasma glucose (mmol l <sup>-1</sup> )                 | 0.80 $\pm$ 0.13              | 0.0021**    | 0.86 $\pm$ 0.16              | 0.00023***  |
| Insulin (pmol l <sup>-1</sup> )                        | 22.3 $\pm$ 10.5              | 0.036*      | 25.6 $\pm$ 9.5               | 0.021*      |
| C-peptide (pmol l <sup>-1</sup> )                      | 113 $\pm$ 53                 | 0.056       | 99 $\pm$ 70                  | 0.18        |
| HOMA-IR                                                | 1.26 $\pm$ 0.51              | 0.012*      | 1.36 $\pm$ 0.43              | 0.013*      |
| <i>Substrates</i>                                      |                              |             |                              |             |
| Lactate (mmol l <sup>-1</sup> )                        | 0.60 $\pm$ 0.12              | 0.00033***  | 0.65 $\pm$ 0.12              | 0.00026***  |
| Glycerol ( $\mu$ mol l <sup>-1</sup> )                 | -5.3 $\pm$ 2.9               | 0.097       | -0.3 $\pm$ 3.4               | 0.93        |
| FFA ( $\mu$ mol l <sup>-1</sup> )                      | -161 $\pm$ 50                | 0.0071**    | -162 $\pm$ 38                | 0.0014**    |
| $\beta$ -hydroxybutyrate (mmol l <sup>-1</sup> )       | -0.10 $\pm$ 0.04             | 0.0024**    | -0.11 $\pm$ 0.06             | 0.0093**    |
| Alanine ( $\mu$ mol l <sup>-1</sup> )                  | 216 $\pm$ 26                 | 0.0017**    | 227 $\pm$ 30                 | 0.000011*** |
| <i>Circulatory measures</i>                            |                              |             |                              |             |
| Heart rate (beats min <sup>-1</sup> )                  | 6.2 $\pm$ 1.6                | 0.0026**    | 6.9 $\pm$ 1.5                | 0.00081***  |
| Stroke volume (ml)                                     | 4.6 $\pm$ 2.0                | 0.044*      | 5.1 $\pm$ 1.8                | 0.00073***  |
| Cardiac output (L min <sup>-1</sup> )                  | 0.9 $\pm$ 0.1                | 0.000034*** | 1.1 $\pm$ 0.2                | 0.00073***  |
| Systemic vascular resistance (dyn s cm <sup>-5</sup> ) | -203 $\pm$ 31                | 0.00017***  | -142 $\pm$ 39                | 0.0038**    |
| Systolic pressure (mmHg)                               | -3.5 $\pm$ 2.5               | 0.19        | -1.6 $\pm$ 2.4               | 0.53        |
| Diastolic pressure (mmHg)                              | -4.1 $\pm$ 1.5               | 0.020*      | 0.9 $\pm$ 1.1                | 0.44        |
| Mean arterial pressure (mmHg)                          | -4.5 $\pm$ 1.6               | 0.016*      | 1.5 $\pm$ 1.4                | 0.30        |

31

32 Values are mean  $\pm$  SEM. For genotype groups of subjects homozygous for either the Arg16 allele (AA) or the Gly16 allele  
33 (GG) of the  $\beta_2$ -receptor gene (*ADRB2*), comparison between baseline before and after repeated hypoglycemia (pre-  
34 hypoglycemia and post-hypoglycemia, respectively) was by paired t-test if normally distributed or by Wilcoxon signed-  
35 rank test if not. No missing values (n=25). \*  $P \leq 0.05$ ; \*\*  $P \leq 0.01$ ; \*\*\*  $P \leq 0.001$ .

36

37 Table S5. Comparison of changes in the glucose, insulin, and substrate responses to epinephrine before and  
 38 after repeated hypoglycemia, in subjects homozygous for the Arg16 allele and Gly16 allele of the  $\beta_2$ -receptor  
 39 gene (*ADRB2*)

|                                                         | AA $\Delta$ -values |            | GG $\Delta$ -values |            | GG vs AA $\Delta$ -values |         |
|---------------------------------------------------------|---------------------|------------|---------------------|------------|---------------------------|---------|
|                                                         | (post vs pre hypo)  | P-value    | (post vs pre hypo)  | P-value    | GG vs AA $\Delta$ -values | P-value |
| <i>Glucose, insulin, and C-peptide</i>                  |                     |            |                     |            |                           |         |
| Glucose (mmol l <sup>-1</sup> h)                        | -0.29 $\pm$ 0.12    | 0.050      | -0.75 $\pm$ 0.22    | 0.011*     | -0.46 $\pm$ 0.24          | 0.059   |
| Insulin (pmol l <sup>-1</sup> h)                        | 35 $\pm$ 15         | 0.039*     | 15 $\pm$ 12         | 0.22       | -19 $\pm$ 19              | 0.32    |
| C-peptide (pmol l <sup>-1</sup> h)                      | 160 $\pm$ 63        | 0.027*     | 90 $\pm$ 51         | 0.11       | -69 $\pm$ 82              | 0.39    |
| <i>Substrates</i>                                       |                     |            |                     |            |                           |         |
| Lactate (mmol l <sup>-1</sup> h)                        | -0.69 $\pm$ 0.24    | 0.017*     | -0.89 $\pm$ 0.24    | 0.0033**   | -0.21 $\pm$ 0.35          | 0.55    |
| Glycerol ( $\mu$ mol l <sup>-1</sup> h)                 | -16 $\pm$ 9         | 0.11       | -52 $\pm$ 10        | 0.00020*** | -35 $\pm$ 13              | 0.008   |
| FFA ( $\mu$ mol l <sup>-1</sup> h)                      | -154 $\pm$ 106      | 0.17       | -470 $\pm$ 139      | 0.0063**   | -315 $\pm$ 173            | 0.069   |
| $\beta$ -hydroxybutyrate (mmol l <sup>-1</sup> h)       | -0.26 $\pm$ 0.10    | 0.014*     | -0.37 $\pm$ 0.09    | 0.0016**   | -0.11 $\pm$ 0.14          | 0.41    |
| Alanine ( $\mu$ mol l <sup>-1</sup> h)                  | -133 $\pm$ 24       | 0.00011*** | -119 $\pm$ 39       | 0.0054**   | 14 $\pm$ 45               | 0.74    |
| <i>Circulatory Measures</i>                             |                     |            |                     |            |                           |         |
| Heart rate (beats min <sup>-1</sup> h)                  | -9.2 $\pm$ 3.3      | 0.016*     | -7.7 $\pm$ 3.0      | 0.025*     | 1.4 $\pm$ 4.4             | 0.75    |
| Stroke volume (ml h)                                    | -9.1 $\pm$ 3.8      | 0.036*     | -12.4 $\pm$ 4.0     | 0.011*     | -3.3 $\pm$ 5.6            | 0.55    |
| Cardiac output (L min <sup>-1</sup> h)                  | -1.5 $\pm$ 0.5      | 0.0052**   | -1.6 $\pm$ 0.4      | 0.013*     | -0.2 $\pm$ 0.6            | 0.82    |
| Systemic vascular resistance (dyn s cm <sup>-5</sup> h) | 275 $\pm$ 61        | 0.00070*** | 244 $\pm$ 56        | 0.0042**   | -32 $\pm$ 83              | 0.71    |
| Systolic pressure (mmHg h)                              | 3.0 $\pm$ 7.3       | 0.69       | -1.3 $\pm$ 4.0      | 0.75       | -4.3 $\pm$ 8.5            | 0.61    |
| Diastolic pressure (mmHg h)                             | 4.0 $\pm$ 2.7       | 0.17       | 2.2 $\pm$ 2.5       | 0.40       | -1.8 $\pm$ 3.7            | 0.63    |
| Mean arterial pressure (mmHg h)                         | 2.6 $\pm$ 3.5       | 0.47       | 1.6 $\pm$ 2.7       | 0.55       | -1.0 $\pm$ 4.4            | 0.82    |



41 The values of plasma glucose, insulin, substrate, and circulatory responses to epinephrine are indicated as the change  
42 from baseline during a 2h period (area under the curve (AUC), values are mean  $\pm$  SEM. For genotype groups either  
43 homozygous for the Arg16 allele (AA) or homozygous for the Gly16 allele (GG) of the  $\beta_2$ -receptor gene (*ADRB2*),  
44 comparison between the pre-hypoglycemia and post-hypoglycemia epinephrine response is by paired t-test if normally  
45 distributed or by Wilcoxon signed-rank test if not. Comparison between the AA and GG genotype groups  $\Delta$ -values (pre-  
46 hypoglycemia versus post-hypoglycemia) is by linear mixed model (LMM). No missing values (n=25). \*  $P \leq 0.05$ ; \*\*  $P \leq$   
47 0.01; \*\*\*  $P \leq 0.001$ .

48

49

50

51 *Supplemental Data Figure legends*

52 Figure S1 Hypoglycemia trial overview

53 The study protocol consisted of 2 consecutive hypoglycemia trial days. An insulin-glucose clamp constituted  
54 by a continuous infusion of insulin  $1.5 \text{ mU kg}^{-1} \text{ min}^{-1}$  and a variable infusion of 20% glucose was used to regulate  
55 plasma glucose. Plasma glucose was measured every 10 min during euglycemia periods E1 to E4 (5 to 6 mmol  
56  $\text{l}^{-1}$ ) and every 5 min during hypoglycemia periods H1 to H3 (2.3 to 2.7 mmol  $\text{l}^{-1}$ ).

57
