# Supplementary material
Source: publisher figshare collection journal article supplement (https://diabetesjournals.figshare.com/articles/dataset/_/22242586)

**Trial Day 2 (D2<sub>hypo1-2</sub>) - Hypoglycemia periods 1 - 2 (H1-2)**

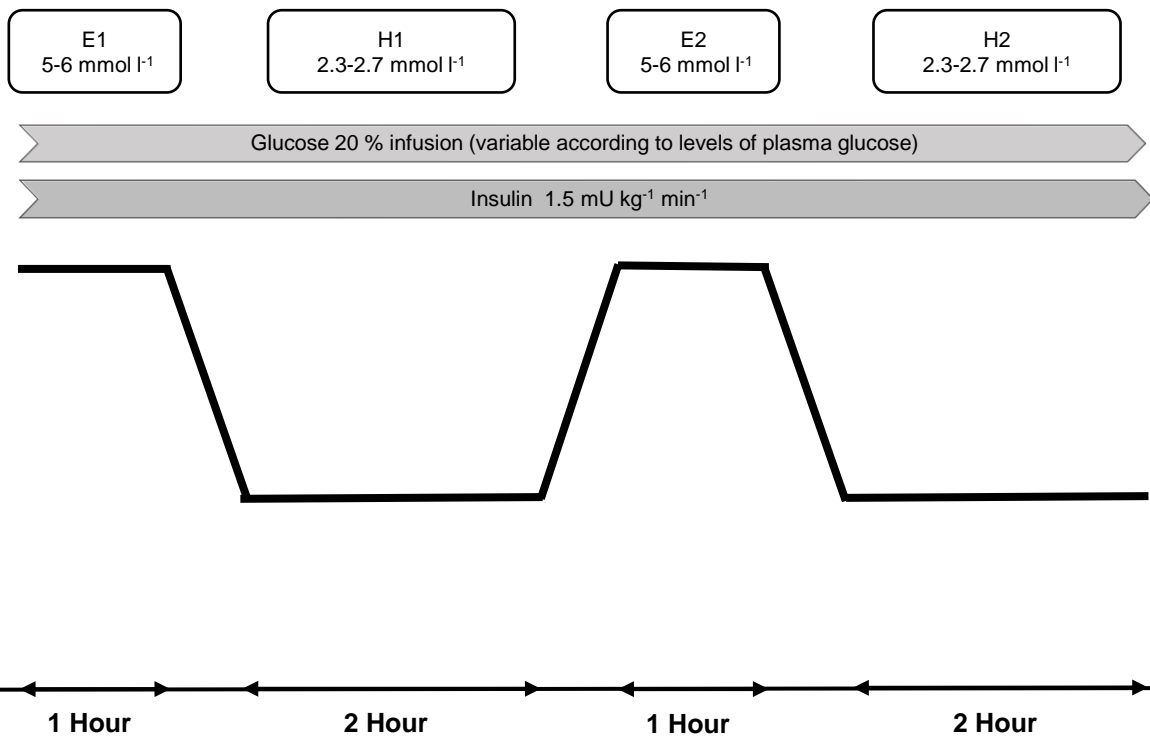

**Trial Day 3 (D3<sub>hypo3</sub>) - Hypoglycemia period 3 (H3)**

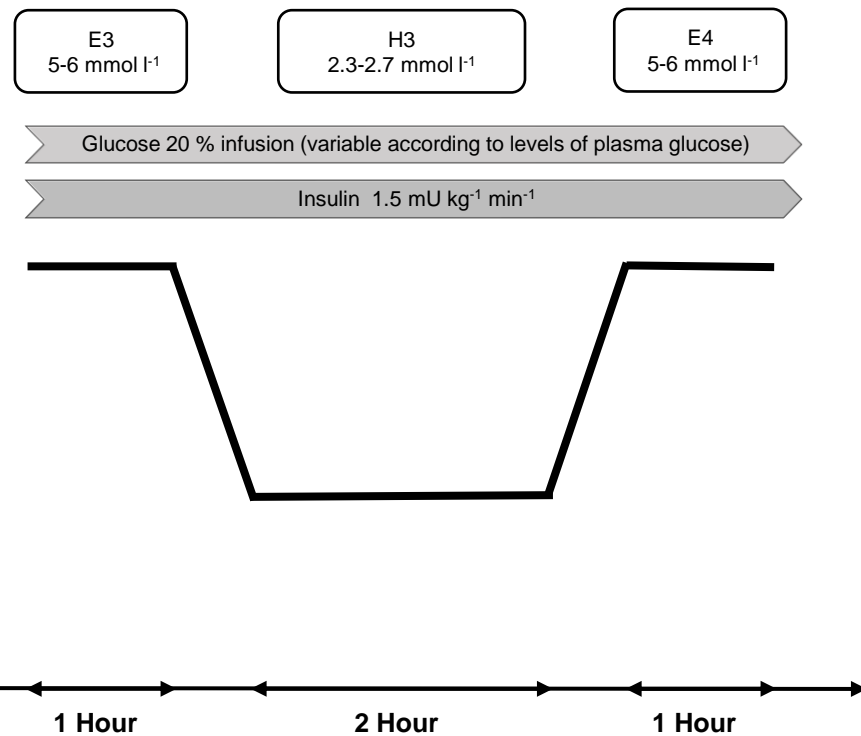

Supplement: Supplementary file 1 [file 1]
